# Supplementary material for: Autologous transplantation of umbilical cord blood-derived cells in extreme preterm infants: protocol for a safety and feasibility study
Source: PubMed Central journal article supplement — BMJ Open. 2020 May 11;10(5):e036065. doi: 10.1136/bmjopen-2019-036065 (PMC7223148; doi:10.1136/bmjopen-2019-036065), 2020-05-11

# BMJ Open

BMJ Open is committed to open peer review. As part of this commitment we make the peer review history of every article we publish publicly available.

When an article is published we post the peer reviewers' comments and the authors' responses online. We also post the versions of the paper that were used during peer review. These are the versions that the peer review comments apply to.

The versions of the paper that follow are the versions that were submitted during the peer review process. They are not the versions of record or the final published versions. They should not be cited or distributed as the published version of this manuscript.

BMJ Open is an open access journal and the full, final, typeset and author-corrected version of record of the manuscript is available on our site with no access controls, subscription charges or pay-per-view fees (<http://bmjopen.bmj.com>).

If you have any questions on BMJ Open's open peer review process please email [info.bmjopen@bmj.com](mailto:info.bmjopen@bmj.com)

# BMJ Open

## Autologous transplantation of umbilical cord blood derived stem cells in extreme preterm infants: protocol for a safety and feasibility study

|                               |                                                                                                                                                                                                                                                                                                                                                                         |
|-------------------------------|-------------------------------------------------------------------------------------------------------------------------------------------------------------------------------------------------------------------------------------------------------------------------------------------------------------------------------------------------------------------------|
| Journal:                      | <i>BMJ Open</i>                                                                                                                                                                                                                                                                                                                                                         |
| Manuscript ID                 | bmjopen-2019-036065                                                                                                                                                                                                                                                                                                                                                     |
| Article Type:                 | Protocol                                                                                                                                                                                                                                                                                                                                                                |
| Date Submitted by the Author: | 28-Nov-2019                                                                                                                                                                                                                                                                                                                                                             |
| Complete List of Authors:     | Malhotra, Atul; Monash University, Novak, Iona<br>Miller, Suzanne; Monash University, The Ritchie Centre, Monash Institute of Medical Research; Monash University, Department of Obstetrics and Gynaecology<br>Jenkin, Graham; Monash University, The Ritchie Centre, Monash Institute of Medical Research; Monash University, Department of Obstetrics and Gynaecology |
| Keywords:                     | Paediatric neurology < PAEDIATRICS, Neurological injury < NEUROLOGY, Neonatal intensive & critical care < INTENSIVE & CRITICAL CARE                                                                                                                                                                                                                                     |
|                               |                                                                                                                                                                                                                                                                                                                                                                         |

SCHOLARONE™  
Manuscripts

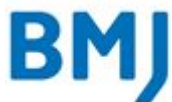

I, the Submitting Author has the right to grant and does grant on behalf of all authors of the Work (as defined in the below author licence), an exclusive licence and/or a non-exclusive licence for contributions from authors who are: i) UK Crown employees; ii) where BMJ has agreed a CC-BY licence shall apply, and/or iii) in accordance with the terms applicable for US Federal Government officers or employees acting as part of their official duties; on a worldwide, perpetual, irrevocable, royalty-free basis to BMJ Publishing Group Ltd ("BMJ") its licensees and where the relevant Journal is co-owned by BMJ to the co-owners of the Journal, to publish the Work in this journal and any other BMJ products and to exploit all rights, as set out in our [licence](#).

The Submitting Author accepts and understands that any supply made under these terms is made by BMJ to the Submitting Author unless you are acting as an employee on behalf of your employer or a postgraduate student of an affiliated institution which is paying any applicable article publishing charge ("APC") for Open Access articles. Where the Submitting Author wishes to make the Work available on an Open Access basis (and intends to pay the relevant APC), the terms of reuse of such Open Access shall be governed by a Creative Commons licence – details of these licences and which [Creative Commons](#) licence will apply to this Work are set out in our licence referred to above.

Other than as permitted in any relevant BMJ Author's Self Archiving Policies, I confirm this Work has not been accepted for publication elsewhere, is not being considered for publication elsewhere and does not duplicate material already published. I confirm all authors consent to publication of this Work and authorise the granting of this licence.

1  
2  
3 **Autologous transplantation of umbilical cord blood derived stem cells in extreme**  
4 **preterm infants: protocol for a safety and feasibility study**  
5  
6  
7

8  
9 *CORD-SAFE Study*  
10

11  
12  
13 Atul Malhotra<sup>1,2,3</sup>, Iona Novak<sup>4,5</sup>, Suzanne L Miller<sup>2,6</sup>, Graham Jenkin<sup>2,6</sup>  
14  
15

16  
17  
18 <sup>1</sup>Monash Newborn, Monash Children's Hospital, Melbourne, Australia  
19

20 <sup>2</sup>The Ritchie Centre, Hudson Institute of Medical Research, Melbourne, Australia  
21

22 <sup>3</sup>Department of Paediatrics, Monash University, Melbourne, Australia  
23

24 <sup>4</sup>Cerebral Palsy Alliance, Sydney, Australia  
25

26 <sup>5</sup>University of Sydney, Sydney, Australia  
27

28 <sup>6</sup>Department of Obstetrics and Gynaecology, Monash University, Melbourne, Australia  
29  
30  
31

32 **Corresponding Author:**  
33

34 Dr Atul Malhotra, PhD  
35

36 Monash Children's Hospital  
37

38 246 Clayton Road, Clayton, VIC 3168, Australia  
39

40 Tel: +61 3 8572 3650  
41

42 Email: [atul.malhotra@monash.edu](mailto:atul.malhotra@monash.edu)  
43

44 Twitter: @Atul\_Monash  
45  
46  
47  
48

49 **Word count:**  
50  
51

52 **Key words**  
53

54 Brain injury, intraventricular haemorrhage, cerebral palsy, mononuclear cells  
55  
56  
57  
58  
59  
60

## ABSTRACT

**Introduction:** Preterm brain injury continues to be an important complication of preterm birth, especially in extremely premature infants. Umbilical cord blood derived cells (UCBCs) are being increasingly evaluated for their neuroprotective and neuroreparative properties in preclinical and clinical studies. There remains a paucity of information on the feasibility and safety of autologous UCBC transplantation in extremely premature infants.

**Methods and Analysis:** A single centre safety and feasibility study in preterm babies born before 28 weeks gestation. Cord blood will be collected after birth and, if sufficient blood is obtained, UCBC mononuclear fractions will be harvested from the cord blood, characterised and stored. After excluding infants who have already suffered severe preterm brain injury, based on cranial ultrasound in first week of life, preterm infants will be infused with autologous UCBC via the intravenous route at a dose of between 25-50 million UCBCs/kg body weight of live cells, with the cell number being the maximum available up to 50 million cells. A minimum of 20 infants will be administered autologous UCBCs. Primary outcomes will include feasibility and safety. Feasibility will be determined as access to sufficient cord blood at collection and UCBCs following processing. Safety will be determined by lack of adverse events directly related to autologous UCBC administration in the first few days after cell administration. Secondary outcomes studied will include neonatal, and neurodevelopmental morbidities till 2 years of life. Additional outcomes will include cord blood cell characterisation of all enrolled infants, and cytokine responses to cell administration in transplanted infants till 36 weeks corrected age.

**Ethics and Dissemination:** Monash Health Human Research Ethics Committee approved this study in December 2019. Recruitment is to commence in January 2020 and is expected to take around 12 months. The findings of this study will be disseminated via peer-reviewed journals and at conferences.

1  
2  
3 **Protocol Version: 2, November 2019**  
4  
5  
6

7 **Trial Registration Number: ACTRN12619001637134**  
8  
9  
10  
11  
12  
13  
14  
15  
16  
17  
18  
19  
20  
21  
22  
23  
24  
25  
26  
27  
28  
29  
30  
31  
32  
33  
34  
35  
36  
37  
38  
39  
40  
41  
42  
43  
44  
45  
46  
47  
48  
49  
50  
51  
52  
53  
54  
55  
56  
57  
58  
59  
60

For peer review only

## ARTICLE SUMMARY

### Strengths and limitations of the study

- A world first study to evaluate the safety and feasibility of autologous umbilical cord blood collection and cell infusion in extreme premature infants.
- A study translating preclinical advances in cell based therapies for perinatal brain injury to the clinical arena.
- Assessment of preterm cord blood cell characteristics and cytokine profiling of response to cell transplantation that may inform mechanisms of action of UCBCs and the design of future efficacy trials.
- Given the phase 1 nature of the study, there are no prospective controls or randomisation.

## INTRODUCTION

More than 3000 very preterm infants (those born less than 32 weeks' gestation) are born every year in Australia and around 7% of them go on to develop cerebral palsy (CP).

Preterm brain injury (especially severe intraventricular haemorrhage and cystic periventricular leukomalacia) complicates the neonatal course of very preterm infants (especially extremely preterm infants; those born before 28 weeks' gestation), contributing as the principal cause of CP in this population (1). Most preterm infants who suffer severe or significant preterm brain injury in the neonatal period have very poor prognosis, with a proportion of them dying during the neonatal period, needing shunt surgery for post haemorrhagic hydrocephalus and, in those who survive, many go on to suffer from adverse long-term neurodevelopment outcomes, including CP. Advances in neonatal care have substantially improved survival in very preterm and extremely preterm infants with brain injury, but no early intervention curative treatment is currently available for preterm brain injury.

Cell therapies are increasingly being tested for neuroprotection and neuroregeneration in young children (2-5), including one current trial using sibling UCB in young children with confirmed CP in Australia (ACTRN12616000403437). Further trials are proposed. There is now substantial preclinical evidence that administration of umbilical cord blood derived mononuclear cells (UCBCs) in the early neonatal period reduces perinatal brain injury and prevents the progression of neuropathology and CP in the long term. UCBCs have been shown to be neuroprotective for the preterm brain when administered in pre-clinical models of hypoxic-ischemic and inflammation-induced preterm brain injury (6-8). More recently, we have shown that a single dose of UCBC therapy delivered improvement in long-term behavioural outcomes in a rat model of neonatal hypoxic ischemic injury (9). Umbilical cord blood can be easily and safely collected at birth, leading to a high cell yield which contains a wide variety of stem and progenitor cells that have been shown to mediate positive benefits on a variety of neurological cells, including glial cells, neurons and cells that maintain the



1  
2  
3 blood brain barrier (BBB) (2, 10-12). These, and other, studies show that the neuroprotective  
4 and neuroreparative benefits of early UCBC therapy for the developing brain are likely  
5 mediated by their anti-apoptotic, anti-inflammatory, pro-angiogenic, neurogenic, antioxidant,  
6 and BBB protective mechanisms (4, 6-8). Most of these studies have used term cord blood-  
7 derived UCBCs, but we have also investigated the neuroprotective/neuroreparative  
8 characteristics of preterm UCBCs (6, 13). There are only two published clinical studies,  
9 which have been conducted, in preterm infants using autologous UCBCs, but the gestation  
10 age of included infants was greater than 28 weeks (14, 15).  
11  
12  
13  
14  
15  
16  
17  
18  
19  
20  
21

22 We hypothesise that in extremely premature infants, i) autologous umbilical cord blood cell  
23 (UCBC) collection at birth will be feasible and the ii) intravenous administration of umbilical  
24 cord blood derived stem cells in the neonatal period will be safe. The specific aims of this  
25 study, thus, are to test the feasibility of collection of sufficient UCBC from cord blood; and  
26 safety of autologous intravenous UCBC administration in extremely preterm infants during  
27 the neonatal period.  
28  
29  
30  
31  
32  
33  
34  
35  
36

## 37 **METHODS AND ANALYSIS**

38 *Design:* Phase 1, single centre feasibility and safety study.  
39  
40  
41  
42

43 *Setting:* Monash Newborn, Monash Children's Hospital, Monash Health.  
44  
45  
46

47 *Participants:* Extreme preterm infants born before 28 completed weeks of gestation (up to  
48 27<sup>+6</sup> weeks).  
49  
50  
51  
52

53 *Sample size:* We aim to administer UCBCs to at least 20 extremely preterm infants at the  
54 dose range detailed below. The sample size is consistent with other phase 1 UCBC trials  
55 conducted in newborn infants (2, 14). The number of recruited infants and cord blood  
56 collections will exceed 20 as we may not have enough cord blood collected after birth, or  
57  
58  
59  
60

1  
2  
3 may not have enough UCBCs available for administration after processing of the cord blood.  
4  
5 Further, some infants may be excluded after cord blood collection as per exclusion criteria  
6  
7 below. See participant flow in Figure 1.  
8  
9

### 10 11 Cord blood collection

12  
13 *Cord blood collection and processing:* Umbilical cord blood will be collected from all eligible  
14  
15 extreme preterm infants of parents who have consented. Size appropriate needle and  
16  
17 collection containers/ bags will be used to maximise the volume of cord blood that can be  
18  
19 obtained. Minimum cord blood collection volume for inclusion in the trial will be 9 mLs.  
20  
21 Infants with collected cord volume of less than 9 mLs will be excluded from the trial, but their  
22  
23 cord blood will be retained and its characteristics investigated as part of a sub-study. The  
24  
25 collected cord blood ( $\geq 9$  mLs) will be processed according to standard cord blood  
26  
27 processing operating procedures, aliquoted and cryopreserved.  
28  
29

30  
31  
32 *Storage and release:* An aliquot containing sufficient numbers of UCBCs, according to  
33  
34 weight of the preterm infant, required for early administration (see dose below) will be stored.  
35  
36 Any excess UCBCs will compose further aliquot(s) that will be stored separately for potential  
37  
38 subsequent use, not comprising part of the current trial. Cell Care (Heatherton, VIC), a TGA  
39  
40 accredited cord blood bank, will be responsible for collection, processing, storage of all  
41  
42 samples and release of UCBC for autologous administration to the preterm infants. Standard  
43  
44 testing for impurities, cell viability and DNA matching of UCBC to the preterm infant's DNA  
45  
46 will be performed before release of UCBCs. Criteria for product release will include: free of  
47  
48 microbial contamination after 7 days of culture, cell viability > 70% as determined by trypan  
49  
50 blue exclusion at the time of cryopreservation and following dilution prior to administration,  
51  
52 after thawing and washing of cell and DNA match of cord blood and infant sample.  
53  
54

55  
56  
57 *Thawing and infusion preparation:* On the day of infusion, UCBCs will be retrieved from  
58  
59 liquid nitrogen storage, and, once product release criteria are met, the frozen UCBC aliquot  
60

1  
2  
3 will be transported to Monash Health. Cells will be thawed using a pre-warmed bead bath for  
4 approximately 2 minutes. The UCBCs will be washed with dextrose/ albumin and centrifuged  
5 at 350g for 5 minutes prior to resuspension in dextrose/ albumin, viability testing and  
6 counting of live cell number and dilution to the final desired concentration. The UCBCs will  
7 be suspended at a concentration 10% greater than the desired concentration to allow for cell  
8 loss. Volume of cell infusion prepared will be around 10 mL/kg body weight.  
9  
10  
11  
12  
13  
14  
15  
16  
17

### 18 UCBC administration

19  
20 *Inclusion criteria:* Extreme preterm infants with absence of severe brain injury on neonatal  
21 cranial ultrasound, performed in the first week of life.  
22  
23  
24  
25

26 *Exclusion criteria:* Extreme preterm infants with evidence of severe preterm brain injury as  
27 defined by Grade III-IV intraventricular haemorrhage (16) and/ or cystic periventricular  
28 leukomalacia. Infants who are likely to have redirection of intensive care due to any reason,  
29 as decided by the treating clinical team would also be excluded.  
30  
31  
32  
33  
34  
35  
36

37 *Intervention:* UCBCs from autologous cord blood will be administered intravenously to  
38 infants, between D9 – D15 of life. This will follow a routine D8 cranial ultrasound scan.  
39 Infants with an active bacterial infection (blood culture positive in last 48 hours) or instability  
40 as determined by the treating team will have cell administration deferred, for subsequent  
41 administration, if possible, within the treatment window (D9-15).  
42  
43  
44  
45  
46  
47  
48  
49

50 *Dose:* UCBCs will be administered intravenously (through a peripheral intravenous catheter)  
51 at a dose of 25-50 million viable cells/ kg body weight, 25 million/kg being the proposed  
52 minimum dose, and 50 million/kg being the maximum dose. The dose will depend on the  
53 number of UCBCs able to be processed and deemed viable after cord blood collection. This  
54 dose is based on preclinical (6, 7, 13, 17) and clinical studies (2, 14) on UCBC use for  
55 perinatal brain injury. If the number of cells available is less than 25 million/kg, then cell  
56  
57  
58  
59  
60

1  
2  
3 administration will not occur in this trial but cell characteristics will be studied. Volume of cell  
4  
5 infusion will be around 10 mL/kg and cell infusion will occur over 30 minutes. The cell  
6  
7 administration protocol will be based on an ongoing current placental stem cell study at  
8  
9 Monash Newborn (18).  
10

11  
12  
13 *Cell infusion protocol:* Infants will receive an infusion of UCBCs via a peripheral venous  
14  
15 catheter. The suspension with UCBCs will be filtered through an inline IV filter. The infusion  
16  
17 will be administered over 1 hour via a vertical syringe pump. No other medications, blood  
18  
19 products or solutions will be infused via the same peripheral intravenous site during the  
20  
21 UCBC infusion.  
22  
23

24  
25  
26 *Primary outcomes:* The primary aims of this study are to test i) feasibility of autologous cord  
27  
28 blood collection and cell retrieval following processing from extremely premature infants; and  
29  
30 ii) safety of autologous UCBC administration in eligible extremely preterm infants.  
31  
32

33  
34  
35 Feasibility will be determined by agreement to participate, ability to collect and process  
36  
37 sufficient cord blood, and then access to sufficient UCBCs within the second week of life to  
38  
39 meet the infusion criteria. UCBCs will be collected from all potentially eligible infants but will  
40  
41 only be administered to eligible infants as per inclusion and exclusion criteria above.  
42  
43

44  
45 Safety of UCBC administration will be determined by occurrence of adverse events as  
46  
47 defined below. Infants will be monitored as follows.  
48  
49

#### 50 51 *Monitoring during UCBC infusion and nursery stay*

52  
53 Infants will be observed for 2 hours prior to UCBC infusion to determine their baseline  
54  
55 cardiorespiratory status and establish acceptable parameters for fluctuations during the  
56  
57 infusion. During the infusion, HR, RR, ECG, SpO<sub>2</sub> will be monitored continuously while BP,  
58  
59 temperature, and site of infusion will be checked every 15 minutes. Post infusion, HR, RR,  
60

1  
2  
3 ECG, SpO<sub>2</sub> will be continuously monitored, while BP, and temperature will be checked  
4  
5 hourly.  
6  
7  
8

9  
10 Infants, as a result of their prematurity, are likely to remain inpatients in intensive and special  
11 care nurseries for at least 3-4 months following the UCBC administration. The routine clinical  
12 care afforded infants over this time will serve as monitoring for adverse events.  
13

14  
15 Routine care will include continuous cardiorespiratory monitoring; physical examination  
16 (daily while infants remains on respiratory support); anthropometry (weekly weight, head  
17 circumference, length); documentation of respiratory support requirements; chest  
18 radiograph, as clinically indicated; blood gas analysis, as determined by clinical team; cranial  
19 ultrasound, as per clinical practice but a minimum of two cranial ultrasounds post infusion  
20 prior to discharge (D28, 42); term equivalent age MRI brain, as per clinical practice.  
21  
22  
23  
24  
25  
26  
27  
28  
29

### 30 *Monitoring post discharge*

31  
32 Following discharge from nursery, infants will be assessed at 6, 12, 18 and 24 months  
33 corrected age. Assessment will focus on general health including growth parameters and  
34 physical examination, reporting of any adverse events and medication usage.  
35  
36  
37  
38

39 Neurodevelopmental assessment will be performed using standardised assessment tools,  
40 including General Movements and Hammersmith Infant Neurological Examination (at 3  
41 months corrected age), and the Bayley Scales of Infants and Toddler Development (IV  
42 edition) at 2 years corrected age.  
43  
44  
45  
46  
47  
48

### 49 *Defining Adverse Events*

50  
51 Adverse events will be defined as follows:

- 52 - During infusion
- 53     o Local Site Reaction (Erythema, oedema, extravasation at site of peripheral
- 54         intravenous catheter site)
- 55
- 56
- 57
- 58
- 59
- 60

- Any sustained change of 30% or more from baseline in vital signs (HR, RR, BP, SpO<sub>2</sub>, Temp)
- Within first 24 hours of infusion
  - Any event requiring cardiopulmonary resuscitation
  - Escalation of respiratory support (intubation of an infant receiving non-invasive respiratory support; or change to high frequency oscillatory ventilation in an infant receiving conventional ventilation at the time of UCBC infusion)
  - Fluid bolus or initiation/escalation of inotropic support
- Infection within 48 hours of UCBC infusion (culture proven bacterial, fungal or viral infection, or culture negative, clinically suspected infection)

*Data Safety Monitoring Board (DSMB):* An independent DSMB has been formed comprising a neonatologist, and a cell scientist/ biologist to review all adverse incidents. Adverse incidents will be reported to DSMB within 1 week of occurrence.

*Reporting to HREC:* The following reports will be submitted to HREC:

1. Any adverse event/ reaction deemed suitable by DSMB to temporarily halt the trial pending review.
2. An interim report after UCBC administration to 10 babies.
3. Annual research progress report.
4. Any updates to protocol/ PICF.

*Secondary outcomes:* Neonatal and long term general health and neurological outcomes, including cranial ultrasound changes after D8 of life, term equivalent MRI brain findings (if clinically indicated), early neurodevelopment assessments in the first three months of corrected age (General Movements, Hammersmith neonatal/ infant neurological examinations), and 2 year neurodevelopment assessment (BSID-IV). The secondary

1  
2  
3 outcomes of the study participants may also be compared to a matched historical cohort  
4 (same criteria of no evidence of severe brain injury by D8 scan) of extremely premature  
5 infants.  
6  
7  
8  
9

10  
11 In a sub study, we will characterise the composition, characteristics and functionality of the  
12 preterm UCBCs collected from all enrolled infants. Comparative studies with stored term  
13 UCBCs collected for other studies will be considered.  
14  
15  
16

17  
18  
19  
20 We will also conduct a targeted cytokine analysis on infant's serum; namely IL-1b, IL-6, TNF-  
21  $\alpha$  and IL-10 at time (just before) of UCBC administration, 1 day post administration and at 36  
22 -37 weeks postconceptional age as potential biomarkers for response to cell therapy. These  
23 cytokines have been shown to be impacted by UCBC administration in previous studies (7,  
24 8).  
25  
26  
27  
28  
29  
30

31  
32  
33 *Statistical Methods:* As this is a phase I trial, detailed statistical analysis will not be required,  
34 but descriptive and inferential statistical analysis will be conducted as appropriate.  
35  
36 Comparative analysis will be performed between study participants and historical controls.  
37  
38  
39  
40

#### 41 **ETHICS AND DISSEMINATION**

42  
43 Ethics: The study will be conducted in compliance with the approved protocol/amendment(s),  
44 conditions of Monash Health HREC approval and the NHMRC National Statement on Ethical  
45 conduct in Human Research 2007 (updated May 2018). A patient consumer representative  
46 was involved in the ethical preparation and review of this protocol.  
47  
48  
49  
50

51  
52  
53 Consent: Fully informed and written consent will be obtained antenatally from the parents  
54 after detailed discussion regarding the 'experimental' nature of this study, and potential lack  
55 of benefits of cord blood collection and/ or UCBC administration. Consent will not be  
56 obtained during active labour or after birth. In all cases, written consent will be obtained  
57  
58  
59  
60

1  
2  
3 using a specifically designed Participant Information and Consent Form. Participation will be  
4  
5 voluntary and withdrawal, possible at any stage. Should withdrawal occur after an infant  
6  
7 receives the intervention, safety monitoring will be offered in line with the monitoring outlined  
8  
9 in the protocol.  
10

11  
12  
13 The outcomes of this study will be disseminated via peer-reviewed journals and presented at  
14  
15 scientific conferences. A summary report will be made available to all participant families.  
16

### 17 18 19 20 **AUTHOR CONTRIBUTIONS**

21 All authors contributed to the design of the study. AM drafted the initial protocol and  
22  
23 manuscript. IN, SLM and GJ made critical revisions and edited the manuscript. All authors  
24  
25 contributed to and approved the final manuscript.  
26  
27

### 28 29 30 **FUNDING ACKNOWLEDGEMENTS**

31 Cell collection, processing, storage and release will be conducted by Cell Care Australia.  
32  
33 Cell Care was not involved in the design of the trial.  
34  
35  
36  
37

### 38 39 **COMPETING INTERESTS STATEMENT**

40 The authors have no competing interests.  
41  
42  
43  
44  
45  
46  
47  
48  
49  
50  
51  
52  
53  
54  
55  
56  
57  
58  
59  
60



## REFERENCES

1. Chow SSW, Creighton, P., Kander, V., Haslam, R., Lui, K. Report of the Australian and New Zealand Neonatal Network 2016 Sydney: ANZNN; 2018 [Available from: <https://www.anznn.net/Portals/0/AnnualReports/Report of the Australian and New Zealand Neonatal Network 2016.pdf>].
2. Cotten CM, Murtha AP, Goldberg RN, Grotegut CA, Smith PB, Goldstein RF, et al. Feasibility of autologous cord blood cells for infants with hypoxic-ischemic encephalopathy. *J Pediatr*. 2014;164(5):973-9.e1.
3. Hattori T, Sato Y, Kondo T, Ichinohashi Y, Sugiyama Y, Yamamoto M, et al. Administration of umbilical cord blood cells transiently decreased hypoxic-ischemic brain injury in neonatal rats. *Developmental neuroscience*. 2015;37(2):95-104.
4. Aridas JD, McDonald CA, Paton MC, Yawno T, Sutherland AE, Nitsos I, et al. Cord blood mononuclear cells prevent neuronal apoptosis in response to perinatal asphyxia in the newborn lamb. *J Physiol*. 2016;594(5):1421-35.
5. Min K, Song J, Kang JY, Ko J, Ryu JS, Kang MS, et al. Umbilical cord blood therapy potentiated with erythropoietin for children with cerebral palsy: a double-blind, randomized, placebo-controlled trial. *Stem cells (Dayton, Ohio)*. 2013;31(3):581-91.
6. Li J, Yawno T, Sutherland A, Loose J, Nitsos I, Allison BJ, et al. Term versus preterm cord blood cells for the prevention of preterm brain injury. *Pediatr Res*. 2017.
7. Li J, Yawno T, Sutherland A, Loose J, Nitsos I, Bischof R, et al. Preterm white matter brain injury is prevented by early administration of umbilical cord blood cells. *Exp Neurol*. 2016;283(Pt A):179-87.
8. Paton MCB, Allison BJ, Li J, Fahey MC, Sutherland AE, Nitsos I, et al. Human Umbilical Cord Blood Therapy Protects Cerebral White Matter from Systemic LPS Exposure in Preterm Fetal Sheep. *Developmental neuroscience*. 2018;40(3):258-70.
9. McDonald CA, Penny TR, Paton MCB, Sutherland AE, Nekkanti L, Yawno T, et al. Effects of umbilical cord blood cells, and subtypes, to reduce neuroinflammation following perinatal hypoxic-ischemic brain injury. *Journal of neuroinflammation*. 2018;15(1):47.
10. Phillips AW, Johnston MV, Fatemi A. The potential for cell-based therapy in perinatal brain injuries. *Translational stroke research*. 2013;4(2):137-48.
11. McDonald CA, Fahey MC, Jenkin G, Miller SL. Umbilical cord blood cells for treatment of cerebral palsy; timing and treatment options. *Pediatr Res*. 2017.
12. Jantzie LL, Scafidi J, Robinson S. Stem cells and cell-based therapies for cerebral palsy: A call for rigor. *Pediatr Res*. 2017.
13. Li J, Yawno T, Sutherland AE, Gurung S, Paton M, McDonald C, et al. Preterm umbilical cord blood derived mesenchymal stem/stromal cells protect preterm white matter brain development against hypoxia-ischemia. *Experimental neurology*. 2018;308:120-31.
14. Yang J, Ren Z, Zhang C, Rao Y, Zhong J, Wang Z, et al. Safety of Autologous Cord Blood Cells for Preterms: A Descriptive Study. *Stem cells international*. 2018;2018:5268057.
15. Ren Z, Xu F, Zhang X, Zhang C, Miao J, Xia X, et al. Autologous cord blood cells infusion in preterm neonates safely reduces respiratory support duration and potentially preterm complications. *Stem cells translational medicine*. 2019.
16. Papile LA, Burstein J, Burstein R, Koffler H. Incidence and evolution of subependymal and intraventricular hemorrhage: a study of infants with birth weights less than 1,500 gm. *The Journal of pediatrics*. 1978;92(4):529-34.
17. Paton MCB, Allison BJ, Fahey MC, Li J, Sutherland AE, Pham Y, et al. Umbilical cord blood versus mesenchymal stem cells for inflammation-induced preterm brain injury in fetal sheep. *Pediatric research*. 2019.
18. Baker EK, Malhotra A, Lim R, Jacobs SE, Hooper SB, Davis PG, et al. Human amnion cells for the prevention of bronchopulmonary dysplasia: a protocol for a phase I dose escalation study. *BMJ open*. 2019;9(2):e026265.

Figure 1. Participant flow

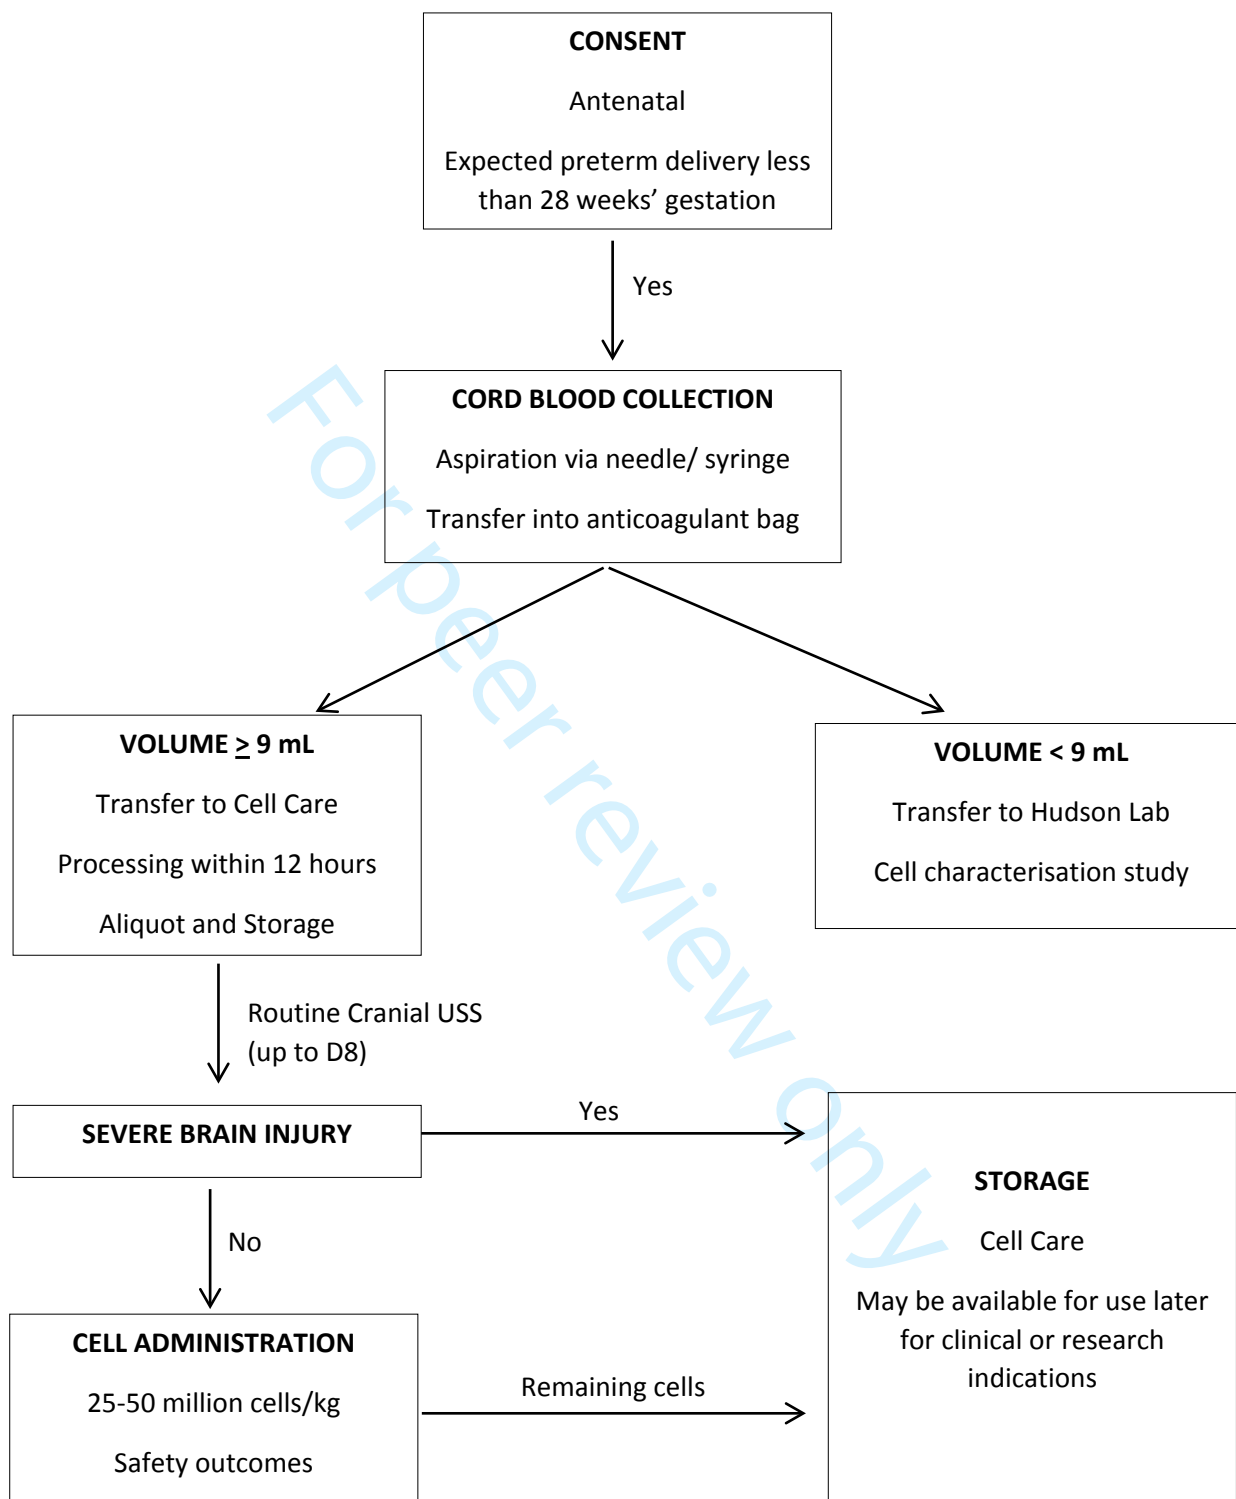

# BMJ Open

## Autologous transplantation of umbilical cord blood derived stem cells in extreme preterm infants: protocol for a safety and feasibility study

|                                 |                                                                                                                                                                                                                                                                                                                                                                         |
|---------------------------------|-------------------------------------------------------------------------------------------------------------------------------------------------------------------------------------------------------------------------------------------------------------------------------------------------------------------------------------------------------------------------|
| Journal:                        | <i>BMJ Open</i>                                                                                                                                                                                                                                                                                                                                                         |
| Manuscript ID                   | bmjopen-2019-036065.R1                                                                                                                                                                                                                                                                                                                                                  |
| Article Type:                   | Protocol                                                                                                                                                                                                                                                                                                                                                                |
| Date Submitted by the Author:   | 31-Jan-2020                                                                                                                                                                                                                                                                                                                                                             |
| Complete List of Authors:       | Malhotra, Atul; Monash University, Novak, Iona<br>Miller, Suzanne; Monash University, The Ritchie Centre, Monash Institute of Medical Research; Monash University, Department of Obstetrics and Gynaecology<br>Jenkin, Graham; Monash University, The Ritchie Centre, Monash Institute of Medical Research; Monash University, Department of Obstetrics and Gynaecology |
| <b>Primary Subject Heading</b>: | Paediatrics                                                                                                                                                                                                                                                                                                                                                             |
| Secondary Subject Heading:      | Neurology                                                                                                                                                                                                                                                                                                                                                               |
| Keywords:                       | Paediatric neurology < PAEDIATRICS, Neurological injury < NEUROLOGY, Neonatal intensive & critical care < INTENSIVE & CRITICAL CARE                                                                                                                                                                                                                                     |
|                                 |                                                                                                                                                                                                                                                                                                                                                                         |

SCHOLARONE™  
Manuscripts

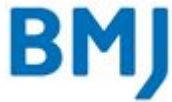

I, the Submitting Author has the right to grant and does grant on behalf of all authors of the Work (as defined in the below author licence), an exclusive licence and/or a non-exclusive licence for contributions from authors who are: i) UK Crown employees; ii) where BMJ has agreed a CC-BY licence shall apply, and/or iii) in accordance with the terms applicable for US Federal Government officers or employees acting as part of their official duties; on a worldwide, perpetual, irrevocable, royalty-free basis to BMJ Publishing Group Ltd ("BMJ") its licensees and where the relevant Journal is co-owned by BMJ to the co-owners of the Journal, to publish the Work in this journal and any other BMJ products and to exploit all rights, as set out in our [licence](#).

The Submitting Author accepts and understands that any supply made under these terms is made by BMJ to the Submitting Author unless you are acting as an employee on behalf of your employer or a postgraduate student of an affiliated institution which is paying any applicable article publishing charge ("APC") for Open Access articles. Where the Submitting Author wishes to make the Work available on an Open Access basis (and intends to pay the relevant APC), the terms of reuse of such Open Access shall be governed by a Creative Commons licence – details of these licences and which [Creative Commons](#) licence will apply to this Work are set out in our licence referred to above.

Other than as permitted in any relevant BMJ Author's Self Archiving Policies, I confirm this Work has not been accepted for publication elsewhere, is not being considered for publication elsewhere and does not duplicate material already published. I confirm all authors consent to publication of this Work and authorise the granting of this licence.

1  
2  
3 **Autologous transplantation of umbilical cord blood derived stem cells in extreme**  
4 **preterm infants: protocol for a safety and feasibility study**  
5  
6  
7

8  
9 *CORD-SAFE Study*  
10

11  
12  
13 Atul Malhotra<sup>1,2,3</sup>, Iona Novak<sup>4,5</sup>, Suzanne L Miller<sup>2,6</sup>, Graham Jenkin<sup>2,6</sup>  
14  
15

16  
17  
18 <sup>1</sup>Monash Newborn, Monash Children's Hospital, Melbourne, Australia  
19

20 <sup>2</sup>The Ritchie Centre, Hudson Institute of Medical Research, Melbourne, Australia  
21

22 <sup>3</sup>Department of Paediatrics, Monash University, Melbourne, Australia  
23

24 <sup>4</sup>Cerebral Palsy Alliance, Sydney, Australia  
25

26 <sup>5</sup>University of Sydney, Sydney, Australia  
27

28 <sup>6</sup>Department of Obstetrics and Gynaecology, Monash University, Melbourne, Australia  
29  
30  
31

32 **Corresponding Author:**  
33

34 Dr Atul Malhotra, PhD  
35

36 Monash Children's Hospital  
37

38 246 Clayton Road, Clayton, VIC 3168, Australia  
39

40 Tel: +61 3 8572 3650  
41

42 Email: [atul.malhotra@monash.edu](mailto:atul.malhotra@monash.edu)  
43

44 Twitter: @Atul\_Monash  
45  
46  
47  
48

49 **Word count:**  
50  
51

52 **Key words**  
53

54 Brain injury, intraventricular haemorrhage, cerebral palsy, mononuclear cells  
55  
56  
57  
58  
59  
60

## ABSTRACT

**Introduction:** Preterm brain injury continues to be an important complication of preterm birth, especially in extremely premature infants. Umbilical cord blood derived cells (UCBCs) are increasingly being evaluated for their neuroprotective and neuroreparative properties in preclinical and clinical studies. There remains a paucity of information on the feasibility and safety of autologous UCBC transplantation in extremely premature infants.

**Methods and Analysis:** A single centre safety and feasibility study in preterm babies born before 28 weeks gestation. Cord blood will be collected after birth and if sufficient blood is obtained, UCB mononuclear cells will be harvested from the cord blood, characterised and stored. After excluding infants who have already suffered severe preterm brain injury, based on cranial ultrasound in first week of life, preterm infants will be infused with autologous UCBCs via the intravenous route at a dose of between 25-50 million UCBCs/kg body weight of live cells, with the cell number being the maximum available up to 50 million cells. A minimum of 20 infants will be administered autologous UCBCs. Primary outcomes will include feasibility and safety. Feasibility will be determined by access to sufficient cord blood at collection and UCBCs following processing. Safety will be determined by lack of adverse events directly related to autologous UCBC administration in the first few days after cell administration. Secondary outcomes studied will include neonatal and neurodevelopmental morbidities till 2 years of life. Additional outcomes will include cell characteristics of all collected cord blood, and cytokine responses to cell administration in transplanted infants till 36 weeks' corrected age.

**Ethics and Dissemination:** Monash Health Human Research Ethics Committee approved this study in December 2019. Recruitment is to commence in February 2020 and is expected to take around 12 months. The findings of this study will be disseminated via peer-reviewed journals and at conferences.

1  
2  
3 **Protocol Version: 2, November 2019**  
4  
5  
6

7 **Trial Registration Number: ACTRN12619001637134**  
8  
9  
10  
11  
12  
13  
14  
15  
16  
17  
18  
19  
20  
21  
22  
23  
24  
25  
26  
27  
28  
29  
30  
31  
32  
33  
34  
35  
36  
37  
38  
39  
40  
41  
42  
43  
44  
45  
46  
47  
48  
49  
50  
51  
52  
53  
54  
55  
56  
57  
58  
59  
60

For peer review only

## ARTICLE SUMMARY

### Strengths and limitations of the study

- A world first study to evaluate the safety and feasibility of autologous umbilical cord blood collection and cell infusion in extreme premature infants.
- A study translating preclinical advances in cell based therapies for perinatal brain injury to the clinical arena.
- Assessment of preterm cord blood cell characteristics and cytokine profiling of response to cell transplantation that may inform mechanisms of action of UCBCs and the design of future efficacy trials.
- Given the phase 1 nature of the study, there are no prospective controls or randomisation.



## INTRODUCTION

More than 3000 very preterm infants (born less than 32 weeks' gestation) are born every year in Australia and around 7% of them go on to develop cerebral palsy (CP). A higher proportion of them develop other adverse neurodevelopment outcomes, including motor developmental delays, cognitive deficits and behavioural disorders. Preterm brain injury (mostly intraventricular haemorrhage and periventricular leukomalacia) complicates the neonatal course of very preterm infants (especially extremely preterm infants; those born before 28 weeks' gestation) (1). Most preterm infants who suffer severe preterm brain injury (severe intraventricular haemorrhage, cystic periventricular leukomalacia) in the neonatal period have very poor prognosis, with a proportion of them dying during the neonatal period, needing shunt surgery for post haemorrhagic hydrocephalus and, in those who survive, many go on to suffer from adverse long-term neurodevelopment outcomes, including CP. Extreme preterm infants with less severe forms of brain injury in the neonatal period are also at risk of adverse neurodevelopment (2). Advances in neonatal care have substantially improved survival in very preterm and extremely preterm infants with brain injury, but no early treatment is currently available for preterm brain injury.

Cell therapies are increasingly being evaluated for neuroprotection and neuroregeneration in young children (3-6), including one current trial using sibling UCB in young children with confirmed CP in Australia (ACTRN12616000403437). Further trials are proposed. There is now substantial preclinical evidence that administration of umbilical cord blood derived mononuclear cells (UCBCs) in the early neonatal period reduces perinatal brain injury and prevents the progression of neuropathology and CP in the long term. UCBCs have been shown to be neuroprotective for the preterm brain when administered in pre-clinical models of preterm brain injury (7-10). More recently, we have shown that a single dose of UCBC therapy also delivered improvements in long-term behavioural outcomes in a rat model of neonatal hypoxic ischemic injury (11). Umbilical cord blood can be easily and safely collected at birth, leading to a high cell yield which contains a wide variety of stem and

1  
2  
3 progenitor cells that have been shown to mediate positive benefits on a variety of  
4  
5 neurological cells, including glial cells, neurons and cells that maintain the blood brain barrier  
6  
7 (BBB) (3, 10, 12-14). These, and other, studies show that the neuroprotective and  
8  
9 neuroreparative benefits of early UCBC therapy for the developing brain are likely mediated  
10  
11 by their anti-apoptotic, anti-inflammatory, pro-angiogenic, neurogenic, antioxidant, and BBB  
12  
13 protective mechanisms (5, 7-10). Most of these studies have used term cord blood-derived  
14  
15 UCBCs, but we have also investigated the neuroprotective/neuroreparative characteristics of  
16  
17 preterm UCBCs (7, 15). There are only two published clinical studies, which have been  
18  
19 conducted, in preterm infants using autologous UCBCs, but the gestation age of included  
20  
21 infants was greater than 28 weeks (16, 17).  
22  
23  
24  
25

26 We hypothesise that in extremely premature infants, i) autologous umbilical cord blood cell  
27  
28 (UCBC) collection at birth will be feasible and the ii) intravenous administration of umbilical  
29  
30 cord blood derived stem cells in the neonatal period will be safe. The specific aims of this  
31  
32 study, thus, are to test the feasibility of collection of sufficient UCBC from cord blood; and  
33  
34 safety of autologous intravenous UCBC administration in extremely preterm infants during  
35  
36 the neonatal period.  
37  
38  
39  
40

## 41 **METHODS AND ANALYSIS**

42  
43 *Design:* Phase 1, single centre feasibility and safety study.  
44  
45

46  
47 *Setting:* Monash Newborn, Monash Children's Hospital, Monash Health.  
48  
49

50  
51 *Participants:* Extreme preterm infants born before 28 completed weeks of gestation (up to  
52  
53 27<sup>+6</sup> weeks).  
54  
55

56  
57  
58 *Sample size:* We aim to administer UCBCs to at least 20 extremely preterm infants at the  
59  
60 dose range detailed below. The sample size is consistent with other phase 1 UCBC trials

1  
2  
3 conducted in newborn infants (3, 16). The number of recruited infants and cord blood  
4 collections will exceed 20 as we may not have enough cord blood collected after birth, or  
5 may not have enough UCBCs available for administration after processing of the cord blood.  
6  
7 Further, some infants may be excluded after cord blood collection as per exclusion criteria  
8  
9 below. See participant flow in Figure 1.  
10  
11  
12  
13

### 14 15 16 Cord blood collection

17  
18 *Cord blood collection and processing:* Umbilical cord blood will be collected from all eligible  
19 extreme preterm infants of parents who have consented. Size appropriate needle (18-21 G)  
20 and collection containers/ bags (Macopharma, Tourcoing, France) will be used to maximise  
21 the volume of cord blood that can be obtained. Minimum cord blood collection volume for  
22 inclusion in the trial will be 9 mLs. Infants with collected cord blood volume of less than 9  
23 mLs will be excluded from the trial, but their cord blood will be retained and its characteristics  
24 investigated as part of a sub-study. For all other infants, the collected cord blood ( $\geq 9$  mLs)  
25 will be processed according to standard cord blood processing procedures, aliquoted and  
26 cryopreserved (18, 19).  
27  
28  
29  
30  
31  
32  
33  
34  
35  
36  
37  
38

39 *Storage and release:* An aliquot containing sufficient numbers of UCBCs, according to  
40 weight of the preterm infant, required for early administration (see dose below) will be stored.  
41 Any excess UCBCs will compose further aliquot(s) that will be stored separately for potential  
42 subsequent use, not comprising part of the current trial. Cell Care (Heatherton, VIC), a TGA  
43 accredited cord blood bank, will be responsible for collection, processing, storage of all cord  
44 blood and release of UCBCs for autologous administration to the preterm infants. Standard  
45 testing for microbes, cell viability and DNA matching of UCBC to the preterm infant's DNA  
46 will be performed before release of UCBCs. Criteria for product release will include: free of  
47 microbial contamination after 7 days of culture, cell viability > 70% as determined by trypan  
48 blue exclusion at the time of cryopreservation and following prior to administration, after  
49 thawing and washing of cryopreserved cells..  
50  
51  
52  
53  
54  
55  
56  
57  
58  
59  
60

1  
2  
3  
4  
5 *Thawing and infusion preparation:* On the day of infusion, UCBCs will be retrieved from  
6 liquid nitrogen storage, and, once product release criteria are met, the frozen UCBC aliquot  
7 will be transported to Monash Health. Cells will be thawed using a pre-warmed bead bath for  
8 approximately 2 minutes. The UCBCs will be washed with dextrose/ albumin and centrifuged  
9 at 350g for 5 minutes prior to resuspension in dextrose/ albumin, viability testing and  
10 counting of live cell number and dilution to the final desired concentration. The UCBCs will  
11 be suspended at a concentration 10% greater than the desired concentration to allow for cell  
12 loss. Volume of cell infusion prepared will be around 10 mL/kg body weight.  
13  
14  
15  
16  
17  
18  
19  
20  
21  
22  
23

#### 24 UCBC administration

25  
26 *Inclusion criteria:* Extreme preterm infants with absence of severe brain injury on neonatal  
27 cranial ultrasound, performed in the first week of life.  
28  
29  
30

31  
32 *Exclusion criteria:* Extreme preterm infants with evidence of severe preterm brain injury as  
33 defined by Grade III-IV intraventricular haemorrhage (20) and/ or cystic periventricular  
34 leukomalacia. Infants who are likely to have redirection of intensive care due to any reason,  
35 as decided by the treating clinical team would also be excluded.  
36  
37  
38  
39  
40  
41  
42

43 *Intervention:* UCBCs from autologous cord blood will be administered intravenously to  
44 infants, between D9 – D15 of life. This will follow a routine D8 cranial ultrasound scan.  
45  
46 Infants with an active bacterial infection (blood culture positive in last 48 hours) or instability  
47 as determined by the treating team will have cell administration deferred, for administration,  
48 if possible, within the treatment window (D9-15).  
49  
50  
51  
52  
53  
54

55 *Dose:* UCBCs will be administered intravenously (through a peripheral intravenous catheter)  
56 at a dose of 25-50 million viable cells/ kg body weight, 25 million/kg being the proposed  
57 minimum dose, and 50 million/kg being the maximum dose. The dose will depend on the  
58  
59  
60

1  
2  
3 number of UCBCs able to be processed and deemed viable after cord blood collection. This  
4  
5 dose is based on preclinical (7, 8, 10, 15, 21) and clinical studies (3, 16) on UCBC use for  
6  
7 perinatal brain injury. If the number of cells available is less than 25 million/kg, then cell  
8  
9 administration will not occur in this trial but cell characteristics will be studied. These extreme  
10  
11 premature infants frequently receive blood products (packed red blood cells, plasma, and  
12  
13 rarely platelets at volumes of 10-15 mL/kg, and hence it was decided that the volume of cell  
14  
15 infusion in this study will also be around 10 mL/kg. The cell administration protocol will be  
16  
17 based on an ongoing current placental stem cell study at Monash Newborn (22).  
18  
19  
20  
21

22 *Cell infusion protocol:* Infants will receive an infusion of UCBCs via a peripheral venous  
23  
24 catheter. The suspension with UCBCs will be filtered through an inline IV filter. The infusion  
25  
26 will be administered over 30 minutes via a vertical syringe pump. No other medications,  
27  
28 blood products or solutions will be infused via the same peripheral intravenous site during  
29  
30 the UCBC infusion.  
31  
32  
33  
34

35 *Primary outcomes:* The primary aims of this study are to test i) feasibility of autologous cord  
36  
37 blood collection and cell retrieval following processing from extremely premature infants; and  
38  
39 ii) safety of autologous UCBC administration in eligible extremely preterm infants.  
40  
41  
42  
43

44 Feasibility will be determined by agreement to participate, ability to collect and process  
45  
46 sufficient cord blood, and then access to sufficient UCBCs within the second week of life to  
47  
48 meet the infusion criteria. UCBCs will be collected from all potentially eligible infants but will  
49  
50 only be administered to eligible infants as per inclusion and exclusion criteria above.  
51  
52  
53

54 Safety of UCBC administration will be determined by occurrence of adverse events as  
55  
56 defined below. Infants will be monitored as follows.  
57  
58  
59

60 *Monitoring during UCBC infusion and nursery stay*

1  
2  
3 Infants will be observed for 2 hours prior to UCBC infusion to determine their baseline  
4 cardiorespiratory status and establish acceptable parameters for fluctuations during the  
5 infusion. During the infusion, HR, RR, ECG, SpO<sub>2</sub> will be monitored continuously while BP,  
6  
7 temperature, and site of infusion will be checked every 15 minutes. Post infusion, HR, RR,  
8  
9 ECG, SpO<sub>2</sub> will be continuously monitored, while BP, and temperature will be checked  
10  
11 hourly.  
12  
13  
14  
15  
16  
17

18 Infants, as a result of their prematurity, are likely to remain inpatients in intensive and special  
19 care nurseries for at least 3-4 months following the UCBC administration. The routine clinical  
20 care afforded infants over this time will serve as monitoring for adverse events.  
21  
22

23 Routine care will include continuous cardiorespiratory monitoring; physical examination  
24 (daily while infants remains on respiratory support); anthropometry (weekly weight, head  
25 circumference, length); documentation of respiratory support requirements; chest  
26 radiograph, as clinically indicated; blood gas analysis, as determined by clinical team; cranial  
27 ultrasound, as per clinical practice but a minimum of two cranial ultrasounds post infusion  
28 prior to discharge (D28, 42); term equivalent age MRI brain, as per clinical practice.  
29  
30  
31  
32  
33  
34  
35  
36  
37  
38

### 39 *Monitoring post discharge*

40 Following discharge from nursery, infants will be assessed at 6, 12, 18 and 24 months  
41 corrected age. Assessment will focus on general health including growth parameters and  
42 physical examination, reporting of any adverse events and medication usage.  
43  
44

45 Neurodevelopmental assessment will be performed using standardised assessment tools,  
46 including General Movements and Hammersmith Infant Neurological Examination (at 3  
47 months corrected age), and the Bayley Scales of Infants and Toddler Development (IV  
48 edition) at 2 years corrected age.  
49  
50  
51  
52  
53  
54

### 55 *Defining Adverse Events*

56 Adverse events will be defined as follows:  
57  
58  
59  
60

- During infusion
  - o Local Site Reaction (Erythema, oedema, extravasation at site of peripheral intravenous catheter site)
  - o Any sustained change of 30% or more from baseline in vital signs (HR, RR, BP, SpO2, Temp)
- Within first 24 hours of infusion
  - o Any event requiring cardiopulmonary resuscitation
  - o Escalation of respiratory support (intubation of an infant receiving non-invasive respiratory support; or change to high frequency oscillatory ventilation in an infant receiving conventional ventilation at the time of UCBC infusion)
  - o Fluid bolus or initiation/escalation of inotropic support
- Infection within 48 hours of UCBC infusion (culture proven bacterial, fungal or viral infection, or culture negative, clinically suspected infection)

*Data Safety Monitoring Board (DSMB):* An independent DSMB has been formed comprising a neonatologist, and a cell scientist/ biologist to review all adverse incidents. Adverse incidents will be reported to DSMB within 1 week of occurrence.

*Reporting to HREC:* The following reports will be submitted to HREC:

1. Any adverse event/ reaction deemed suitable by DSMB to temporarily halt the trial pending review.
2. An interim report after UCBC administration to 10 babies.
3. Annual research progress report.
4. Any updates to protocol/ PICF.

*Secondary outcomes:* Neonatal and long term general health and neurological outcomes, including cranial ultrasound changes after D8 of life (although unlikely to impact IVH

1  
2  
3 outcomes as IVH is more a complication in the first week of life), term equivalent MRI brain  
4 findings (if clinically indicated), early neurodevelopment assessments in the first three  
5 months of corrected age (General Movements, Hammersmith neonatal/ infant neurological  
6 examinations), and 2 year neurodevelopment assessment (BSID-IV). The secondary  
7 outcomes of the study participants may also be compared to a matched historical cohort  
8 (same criteria of no evidence of severe brain injury by D8 scan) of extremely premature  
9 infants.  
10  
11  
12  
13  
14  
15  
16  
17  
18  
19

20 In a sub study, we will characterise the composition, characteristics and functionality of the  
21 preterm UCBCs collected from all enrolled infants. Comparative studies with stored term  
22 UCBCs collected for other studies will be considered.  
23  
24  
25  
26  
27

28 We will also conduct a targeted cytokine analysis on infant's serum; namely IL-1b, IL-6, TNF-  
29  $\alpha$  and IL-10 at time (just before) of UCBC administration, 1 day post administration and at 36  
30 -37 weeks postconceptional age as potential biomarkers for response to cell therapy. These  
31 cytokines have been shown to be impacted by UCBC administration in previous studies (8,  
32 9).  
33  
34  
35  
36  
37  
38  
39  
40

41 *Statistical Methods:* As this is a phase I trial, detailed statistical analysis will not be required,  
42 but descriptive and inferential statistical analysis will be conducted as appropriate.  
43  
44

45 Comparative analysis will be performed between study participants and historical matched  
46 controls.  
47  
48  
49  
50

## 51 **ETHICS AND DISSEMINATION**

52 Ethics: The study will be conducted in compliance with the approved protocol/amendment(s),  
53 conditions of Monash Health HREC approval and the NHMRC National Statement on Ethical  
54 conduct in Human Research 2007 (updated May 2018). Expert neonatal clinical review  
55 panel and hospital ethics committee deliberated with the research team to determine the  
56  
57  
58  
59  
60



1  
2  
3 inclusion criteria. It was felt due to lack of acceptability by clinicians, and in the absence of  
4 safety evidence of UCBC transplantation in extremely premature infants; the trial should first  
5 include infants without severe brain injury to establish feasibility and safety. A patient  
6 consumer representative was involved in the ethics preparation and review of this protocol.  
7  
8  
9  
10

11  
12  
13 Consent: Fully informed and written consent will be obtained antenatally from the parents  
14 after detailed discussion regarding the 'experimental' nature of this study, and potential lack  
15 of benefits of cord blood collection and/ or UCBC administration. Consent will not be  
16 obtained during active labour or after birth. In all cases, written consent will be obtained  
17 using a specifically designed Participant Information and Consent Form. Participation will be  
18 voluntary and withdrawal, possible at any stage. Should withdrawal occur after an infant  
19 receives the intervention, safety monitoring will be offered in line with the monitoring outlined  
20 in the protocol.  
21  
22  
23  
24  
25  
26  
27  
28  
29  
30

31  
32 Patient and public involvement: Consumer input and feedback through the hospital ethics  
33 committee and cerebral palsy alliance (a patient advocacy non-profit organisation) consumer  
34 groups was sought in the design of this and other cord blood trials. A summary report will be  
35 made available to all participant families.  
36  
37  
38  
39  
40  
41  
42

43 The outcomes of this study will be disseminated via peer-reviewed journals and presented at  
44 scientific conferences.  
45  
46  
47  
48

#### 49 **AUTHOR CONTRIBUTIONS**

50  
51 All authors contributed to the design of the study. AM drafted the initial protocol and  
52 manuscript. IN, SLM and GJ made critical revisions and edited the manuscript. All authors  
53 contributed to and approved the final manuscript.  
54  
55  
56  
57  
58  
59

#### 60 **FUNDING ACKNOWLEDGEMENTS**

1  
2  
3 Cell collection, processing, storage and release will be conducted by Cell Care Australia.  
4

5 Cell Care was not involved in the design of the trial.  
6  
7  
8

9 **COMPETING INTERESTS STATEMENT**  
10

11 The authors have no competing interests.  
12  
13  
14  
15  
16  
17  
18  
19  
20  
21  
22  
23  
24  
25  
26  
27  
28  
29  
30  
31  
32  
33  
34  
35  
36  
37  
38  
39  
40  
41  
42  
43  
44  
45  
46  
47  
48  
49  
50  
51  
52  
53  
54  
55  
56  
57  
58  
59  
60

For peer review only

## REFERENCES

1. Chow SSW, Creighton, P., Kander, V., Haslam, R., Lui, K. 2018 Report of the Australian and New Zealand Neonatal Network 2016. ANZNN, Sydney.
2. Bolisetty S, Dhawan A, Abdel-Latif M, Bajuk B, Stack J, Lui K 2014 Intraventricular hemorrhage and neurodevelopmental outcomes in extreme preterm infants. *Pediatrics* 133:55-62.
3. Cotten CM, Murtha AP, Goldberg RN, Grotegut CA, Smith PB, Goldstein RF, Fisher KA, Gustafson KE, Waters-Pick B, Swamy GK, Rattray B, Tan S, Kurtzberg J 2014 Feasibility of autologous cord blood cells for infants with hypoxic-ischemic encephalopathy. *J Pediatr* 164:973-979.e971.
4. Hattori T, Sato Y, Kondo T, Ichinohashi Y, Sugiyama Y, Yamamoto M, Kotani T, Hirata H, Hirakawa A, Suzuki S, Tsuji M, Ikeda T, Nakanishi K, Kojima S, Blomgren K, Hayakawa M 2015 Administration of umbilical cord blood cells transiently decreased hypoxic-ischemic brain injury in neonatal rats. *Dev Neurosci* 37:95-104.
5. Aridas JD, McDonald CA, Paton MC, Yawno T, Sutherland AE, Nitsos I, Pham Y, Ditchfield M, Fahey MC, Wong F, Malhotra A, Castillo-Melendez M, Bhakoo K, Wallace EM, Jenkin G, Miller SL 2016 Cord blood mononuclear cells prevent neuronal apoptosis in response to perinatal asphyxia in the newborn lamb. *J Physiol* 594:1421-1435.
6. Min K, Song J, Kang JY, Ko J, Ryu JS, Kang MS, Jang SJ, Kim SH, Oh D, Kim MK, Kim SS, Kim M 2013 Umbilical cord blood therapy potentiated with erythropoietin for children with cerebral palsy: a double-blind, randomized, placebo-controlled trial. *Stem Cells* 31:581-591.
7. Li J, Yawno T, Sutherland A, Loose J, Nitsos I, Allison BJ, Bischof R, McDonald CA, Jenkin G, Miller SL 2017 Term versus preterm cord blood cells for the prevention of preterm brain injury. *Pediatr Res* 82:1030-1038.
8. Li J, Yawno T, Sutherland A, Loose J, Nitsos I, Bischof R, Castillo-Melendez M, McDonald CA, Wong FY, Jenkin G, Miller SL 2016 Preterm white matter brain injury is prevented by early administration of umbilical cord blood cells. *Exp Neurol* 283:179-187.
9. Paton MCB, Allison BJ, Li J, Fahey MC, Sutherland AE, Nitsos I, Bischof RJ, Dean JM, Moss TJM, Polglase GR, Jenkin G, McDonald CA, Miller SL 2018 Human Umbilical Cord Blood Therapy Protects Cerebral White Matter from Systemic LPS Exposure in Preterm Fetal Sheep. *Dev Neurosci* 40:258-270.
10. Malhotra A, Castillo-Melendez M, Allison BJ, Sutherland AE, Nitsos I, Pham Y, McDonald CA, Fahey MC, Polglase GR, Jenkin G, Miller SL 2020 Neurovascular effects of umbilical cord blood-derived stem cells in growth-restricted newborn lambs : UCBCs for perinatal brain injury. *Stem Cell Res Ther* 11:17.
11. McDonald CA, Penny TR, Paton MCB, Sutherland AE, Nekkanti L, Yawno T, Castillo-Melendez M, Fahey MC, Jones NM, Jenkin G, Miller SL 2018 Effects of umbilical cord blood cells, and subtypes, to reduce neuroinflammation following perinatal hypoxic-ischemic brain injury. *J Neuroinflammation* 15:47.
12. Phillips AW, Johnston MV, Fatemi A 2013 The potential for cell-based therapy in perinatal brain injuries. *Transl Stroke Res* 4:137-148.
13. McDonald CA, Fahey MC, Jenkin G, Miller SL 2018 Umbilical cord blood cells for treatment of cerebral palsy; timing and treatment options. *Pediatr Res* 83:333-344.
14. Jantzie LL, Scafidi J, Robinson S 2018 Stem cells and cell-based therapies for cerebral palsy: A call for rigor. *Pediatr Res* 83:345-355.
15. Li J, Yawno T, Sutherland AE, Gurung S, Paton M, McDonald C, Tiwari A, Pham Y, Castillo-Melendez M, Jenkin G, Miller SL 2018 Preterm umbilical cord blood derived mesenchymal stem/stromal cells protect preterm white matter brain development against hypoxia-ischemia. *Exp Neurol* 308:120-131.

- 1
  - 2
  - 3
  - 4
  - 5
  - 6
  - 7
  - 8
  - 9
  - 10
  - 11
  - 12
  - 13
  - 14
  - 15
  - 16
  - 17
  - 18
  - 19
  - 20
  - 21
  - 22
  - 23
  - 24
  - 25
  - 26
  - 27
  - 28
  - 29
  - 30
  - 31
  - 32
  - 33
  - 34
  - 35
  - 36
  - 37
  - 38
  - 39
  - 40
  - 41
  - 42
  - 43
  - 44
  - 45
  - 46
  - 47
  - 48
  - 49
  - 50
  - 51
  - 52
  - 53
  - 54
  - 55
  - 56
  - 57
  - 58
  - 59
  - 60
16. Yang J, Ren Z, Zhang C, Rao Y, Zhong J, Wang Z, Liu Z, Wei W, Lu L, Wen J, Liu G, Liu K, Wang Q 2018 Safety of Autologous Cord Blood Cells for Preterms: A Descriptive Study. *Stem Cells Int* 2018:5268057.
17. Ren Z, Xu F, Zhang X, Zhang C, Miao J, Xia X, Kang M, Wei W, Ma T, Zhang Q, Lu L, Wen J, Liu G, Liu K, Wang Q, Yang J 2020 Autologous cord blood cells infusion in preterm neonates safely reduces respiratory support duration and potentially preterm complications. *Stem Cells Transl Med* 9:169-176.
18. 2013 Australian code of good manufacturing practice for human blood and blood components, human tissues and human cellular therapy products. Version 1.
19. 2016 NetCord-FACT International Standards for Cord Blood Collection, Banking, and Release for Administration. 6th Edition.
20. Papile LA, Burstein J, Burstein R, Koffler H 1978 Incidence and evolution of subependymal and intraventricular hemorrhage: a study of infants with birth weights less than 1,500 gm. *J Pediatr* 92:529-534.
21. Paton MCB, Allison BJ, Fahey MC, Li J, Sutherland AE, Pham Y, Nitsos I, Bischof RJ, Moss TJ, Polglase GR, Jenkin G, Miller SL, McDonald CA 2019 Umbilical cord blood versus mesenchymal stem cells for inflammation-induced preterm brain injury in fetal sheep. *Pediatr Res* 86:165-173.
22. Baker EK, Malhotra A, Lim R, Jacobs SE, Hooper SB, Davis PG, Wallace EM 2019 Human amnion cells for the prevention of bronchopulmonary dysplasia: a protocol for a phase I dose escalation study. *BMJ Open* 9:e026265.

1  
2  
3 **Figure legends**  
4

5 **Figure 1. Participant flow**  
6  
7  
8  
9  
10  
11  
12  
13  
14  
15  
16  
17  
18  
19  
20  
21  
22  
23  
24  
25  
26  
27  
28  
29  
30  
31  
32  
33  
34  
35  
36  
37  
38  
39  
40  
41  
42  
43  
44  
45  
46  
47  
48  
49  
50  
51  
52  
53  
54  
55  
56  
57  
58  
59  
60

For peer review only

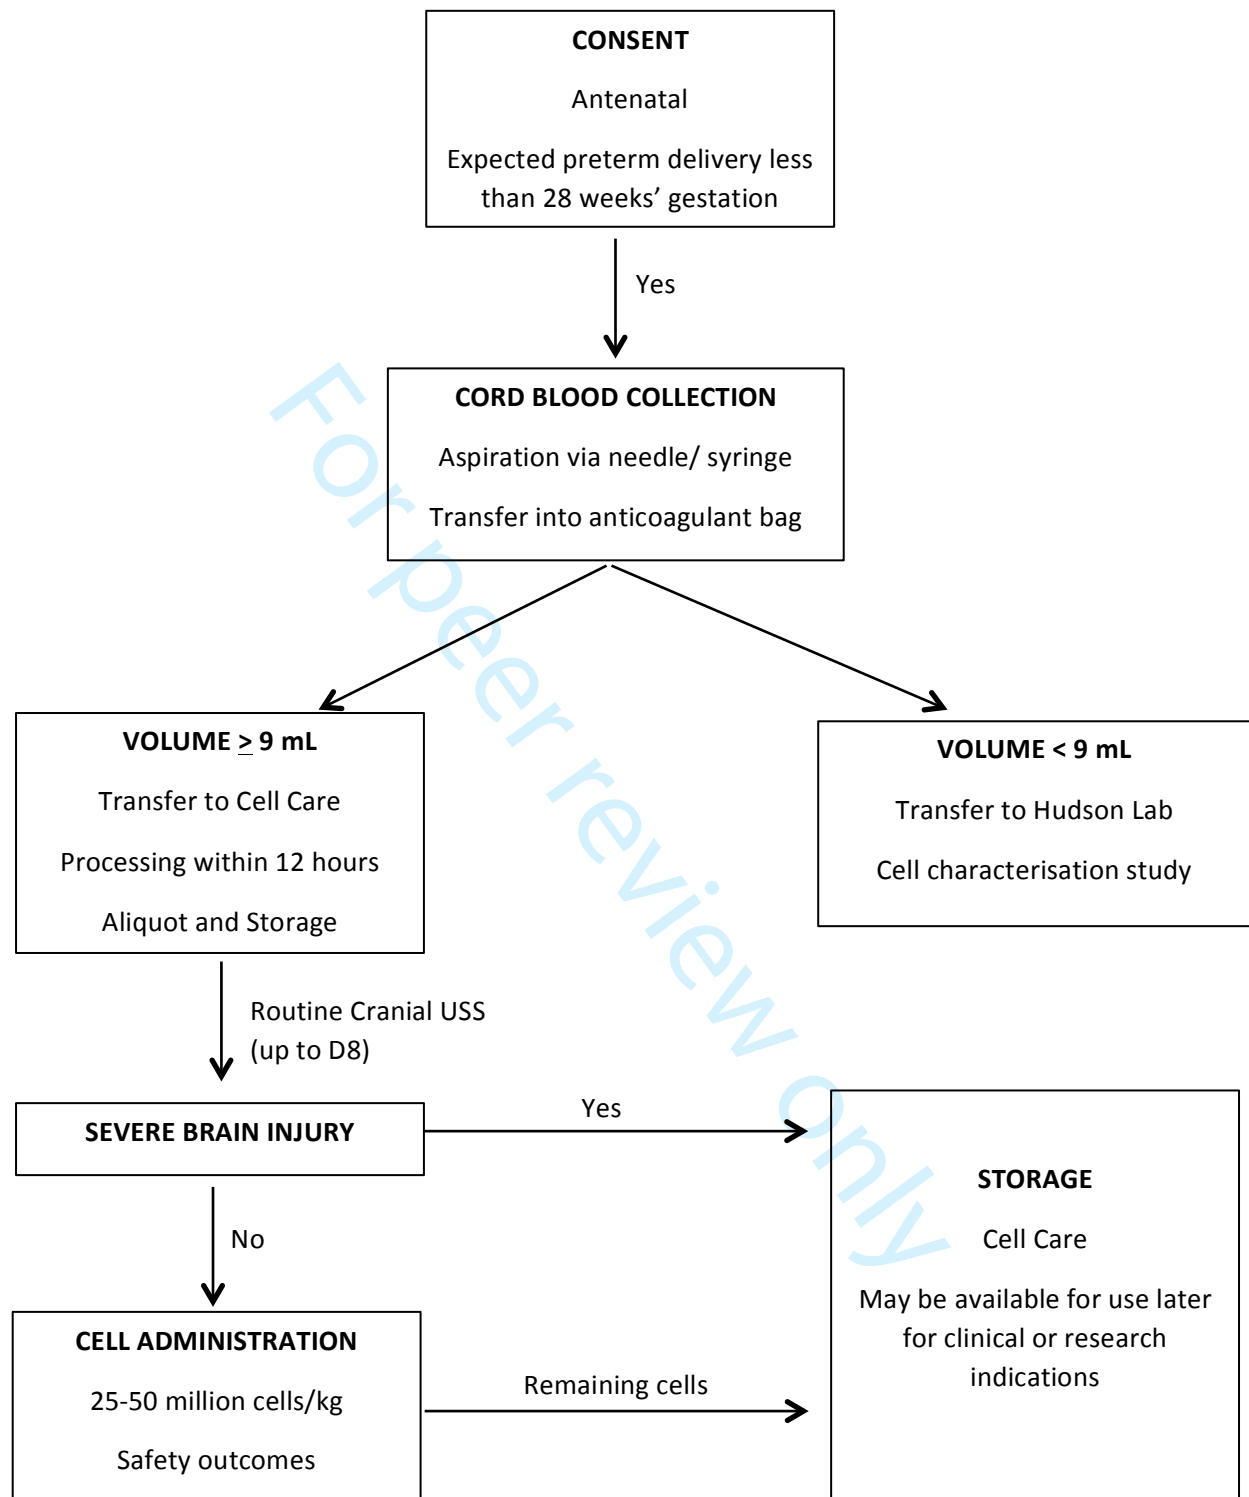

Supplement: bmjopen-2019-036065.draft_revisions.pdf [file bmjopen-2019-036065.draft_revisions.pdf]
